# Supplementary material for: First Report of the Emerging Pathogen Kodamaea ohmeri in Honduras
Source: MDPI journal article supplement (doi:10.3390/jof10030186), 2024-02-28
Supplement: s1 [file s1]

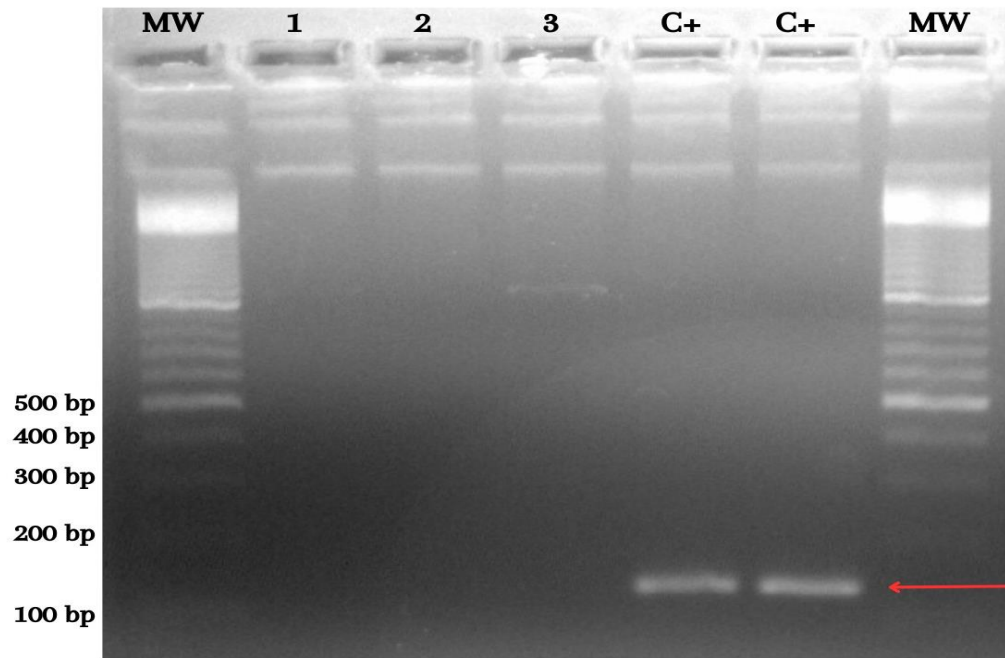

**Figure S1.** Agarose gel electrophoresis. Lanes named as C+ show a 137 bp band as a result of amplification of the GPI gene from the *C. auris* reference strain. Lanes 1, 2 and 3 isolates of *K. ohmeri*, no amplification products are observed. Molecular weight marker from lanes 1 and 7 (size 100 bp).

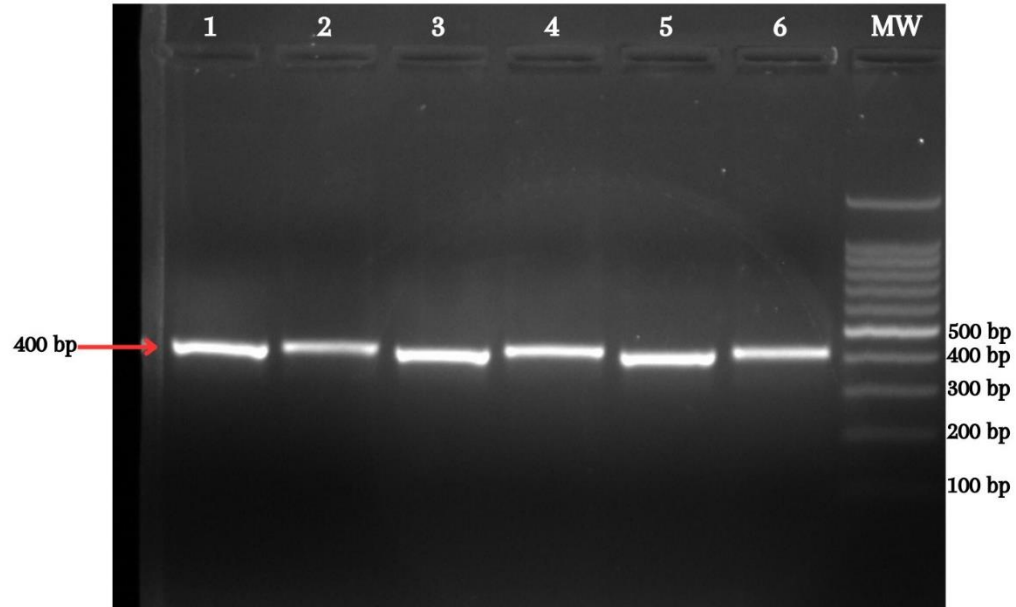

**Figure S2.** Agarose gel electrophoresis. Lanes 1, 3, and 5 show the amplification products of the internal transcribed spacer (ITS) of the ribosomal region of *K. ohmeri*. Lanes 2, 4, and 6 show the PCR products after being subjected to the *MspI* enzyme. Molecular weight marker lane 7 (size 100 bp).

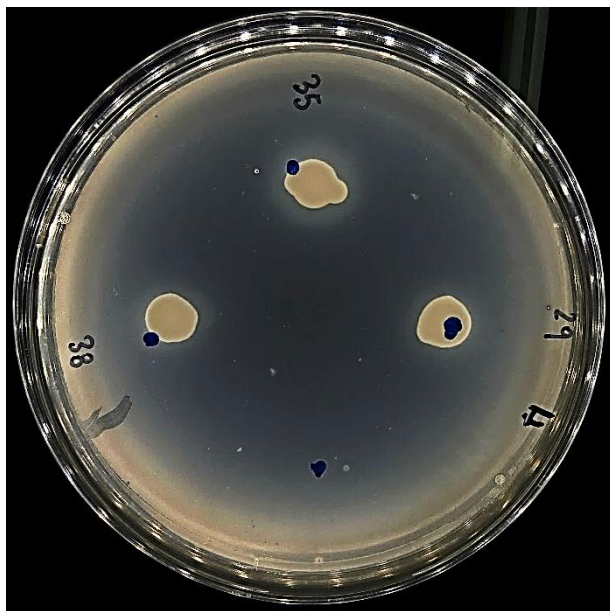

**Figure S3.** Determination of phospholipase activity of *Kodamaea ohmeri* isolates on Sabouraud agar supplemented with egg yolk.

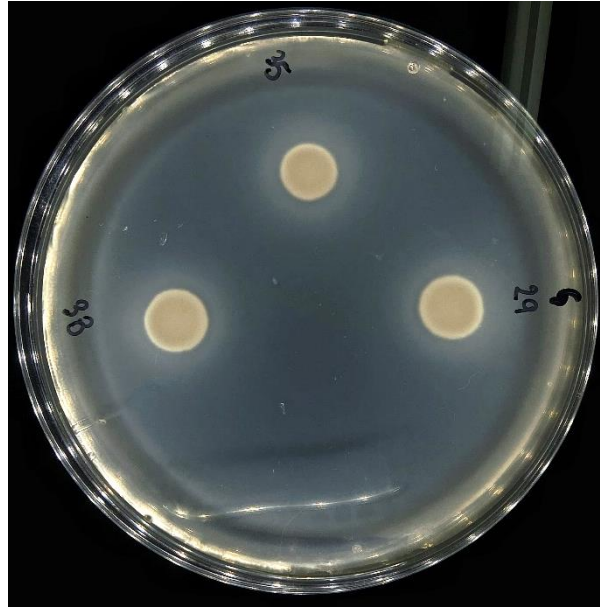

**Figure S4.** Determination of the protease activity of *Kodamaea ohmeri* isolates, gelatinase test.

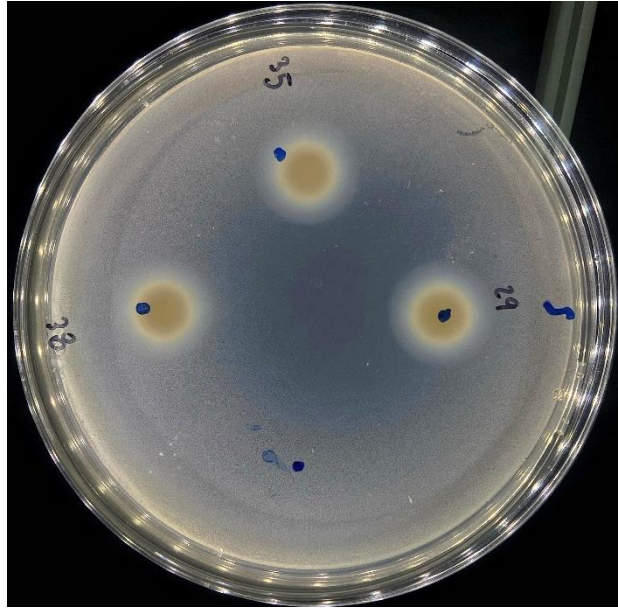

**Figure S5.** Determination of the protease activity of *Kodamaea ohmeri* isolates, Bovine serum albumin agar (BSA).

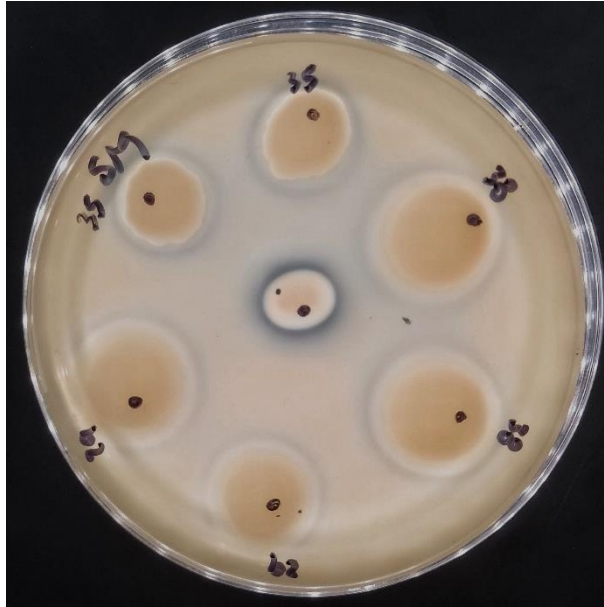

**Figure S6.** Determination of the protease activity of *Kodamaea ohmeri* isolates. Caseinase activity.

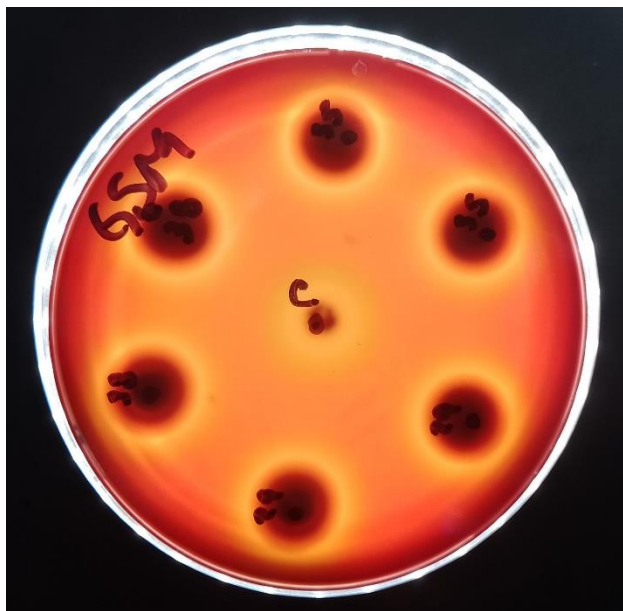

**Figure S7.** Determination of the hemolytic activity of *Kodamaea ohmeri* isolates. Test on Sabouraud agar supplemented with 6% human blood and 3% glucose (pH = 5.6).
